# Supplementary material for: Influence of Association on Binding of Disaccharides to YKL-39 and hHyal-1 Enzymes
Source: MDPI journal article supplement (doi:10.3390/ijms23147705), 2022-07-12
Supplement: s1 [file s1]

## **Supporting Materials: Influence of association on binding of disaccharides to YKL-39 and hHyal-1 enzymes**

Agnieszka Krzemińska,<sup>1</sup> José-Emilio Sánchez-Aparicio,<sup>2</sup> Jean-Didier Maréchal,<sup>2\*</sup> Agata Paneth,<sup>3</sup> and Piotr Paneth<sup>1\*</sup>

1. International Center for Research on Innovative Biobased Materials (ICRI-BioM) - International Research Agenda, Lodz University of Technology, Żeromskiego 116, 90-924 Łódź, Poland
2. Insilichem, Departament de Química, Facultat de Ciències, Universitat Autònoma de Barcelona, 08193 Bellaterra (Barcelona), Spain
3. Faculty of Pharmacy, Medical University of Lublin, Chodźki 4a, 20-210 Lublin, Poland

**Table S1.** Cartesian coordinates for CHI/FUR complex suitable for 4P8V PDB structure.

|     |         |        |        |
|-----|---------|--------|--------|
| C1  | -25.215 | 31.239 | 4.375  |
| C2  | -24.288 | 33.234 | 3.147  |
| C3  | -25.512 | 32.671 | 3.908  |
| C4  | -26.348 | 30.510 | 5.112  |
| O5  | -27.080 | 31.323 | 5.996  |
| S6  | -27.084 | 32.814 | 2.973  |
| O7  | -27.404 | 31.508 | 2.334  |
| O8  | -28.075 | 33.075 | 4.089  |
| O9  | -26.958 | 33.926 | 2.037  |
| H10 | -25.682 | 33.328 | 4.775  |
| H11 | -26.988 | 30.059 | 4.332  |
| H12 | -25.921 | 29.688 | 5.706  |
| H13 | -27.404 | 32.107 | 5.499  |
| C14 | -23.782 | 30.857 | 2.533  |
| O15 | -23.628 | 30.051 | 1.403  |
| C16 | -25.231 | 26.306 | 0.227  |
| O17 | -25.703 | 25.070 | 0.625  |
| H18 | -25.235 | 24.778 | 1.422  |
| C19 | -24.073 | 28.729 | 1.413  |
| C20 | -25.512 | 28.645 | 0.873  |
| O21 | -25.965 | 27.290 | 0.981  |
| C22 | -23.727 | 26.495 | 0.383  |
| C23 | -23.394 | 27.985 | 0.266  |
| C24 | -25.266 | 29.060 | -0.576 |
| O25 | -23.998 | 28.516 | -0.905 |
| H26 | -26.222 | 29.283 | 1.417  |
| H27 | -23.217 | 25.915 | -0.402 |
| H28 | -23.398 | 26.108 | 1.364  |
| H29 | -22.312 | 28.169 | 0.219  |
| H30 | -25.248 | 30.160 | -0.660 |
| H31 | -26.031 | 28.667 | -1.270 |
| H32 | -25.511 | 26.406 | -0.835 |
| H33 | -23.959 | 28.248 | 2.397  |
| O34 | -24.877 | 30.416 | 3.282  |
| H35 | -22.862 | 30.802 | 3.157  |
| H36 | -24.344 | 31.328 | 5.057  |
| C37 | -23.939 | 32.288 | 2.001  |
| O38 | -22.748 | 32.702 | 1.409  |
| H39 | -24.779 | 32.275 | 1.276  |
| H40 | -23.446 | 33.200 | 3.863  |
| O41 | -24.415 | 34.562 | 2.787  |
| H42 | -22.573 | 32.129 | 0.648  |
| H43 | -25.212 | 34.662 | 2.234  |
| H44 | -31.012 | 32.310 | 5.620  |
| C45 | -29.891 | 27.427 | -1.417 |
| C46 | -29.051 | 26.506 | -0.539 |
| C47 | -29.770 | 26.332 | 0.784  |
| C48 | -30.023 | 27.703 | 1.411  |
| C49 | -30.170 | 28.740 | -0.664 |
| O50 | -30.833 | 28.422 | 0.551  |
| H51 | -30.862 | 26.936 | -1.599 |
| O52 | -29.182 | 27.611 | -2.609 |
| H53 | -28.076 | 27.010 | -0.357 |
| O54 | -28.851 | 25.237 | -1.083 |

|     |         |        |        |
|-----|---------|--------|--------|
| N55 | -28.971 | 25.469 | 1.689  |
| H56 | -30.737 | 25.834 | 0.622  |
| C57 | -31.013 | 29.705 | -1.480 |
| H58 | -29.212 | 29.245 | -0.428 |
| O59 | -31.941 | 28.975 | -2.241 |
| H60 | -29.805 | 27.888 | -3.296 |
| H61 | -28.553 | 25.344 | -2.001 |
| H62 | -29.514 | 25.240 | 2.497  |
| H63 | -30.335 | 30.292 | -2.130 |
| H64 | -31.498 | 30.402 | -0.772 |
| H65 | -32.554 | 29.580 | -2.679 |
| C66 | -30.258 | 28.364 | 3.689  |
| C67 | -30.667 | 29.831 | 3.482  |
| C68 | -30.386 | 30.537 | 4.803  |
| C69 | -31.021 | 29.891 | 6.042  |
| C70 | -30.902 | 27.792 | 4.958  |
| O71 | -30.549 | 28.571 | 6.080  |
| H72 | -29.155 | 28.338 | 3.808  |
| O73 | -30.637 | 27.512 | 2.631  |
| H74 | -31.746 | 29.848 | 3.245  |
| O75 | -30.016 | 30.481 | 2.437  |
| N76 | -30.675 | 31.994 | 4.733  |
| H77 | -29.306 | 30.476 | 4.972  |
| O78 | -30.672 | 30.570 | 7.174  |
| C79 | -30.446 | 26.373 | 5.272  |
| H80 | -32.004 | 27.792 | 4.833  |
| O81 | -30.983 | 25.912 | 6.465  |
| H82 | -29.056 | 30.588 | 2.654  |
| H84 | -29.333 | 26.359 | 5.274  |
| H85 | -30.805 | 25.699 | 4.476  |
| H86 | -30.802 | 26.574 | 7.151  |
| H87 | -29.052 | 28.229 | 1.550  |
| H88 | -32.128 | 29.897 | 5.983  |
| H89 | -29.687 | 30.575 | 7.264  |
| H90 | -28.717 | 24.629 | 1.210  |
| H91 | -31.370 | 32.163 | 4.034  |

**Table S2.** Cartesian coordinates for CHI ligand suitable for 4P8V PDB structure.

|     |         |        |        |
|-----|---------|--------|--------|
| H1  | -25.211 | 26.301 | -1.840 |
| C2  | -25.149 | 34.120 | 1.833  |
| C3  | -25.748 | 33.453 | 3.065  |
| C4  | -25.009 | 32.151 | 3.300  |
| C5  | -25.086 | 31.285 | 2.044  |
| C6  | -25.186 | 33.140 | 0.647  |
| O7  | -24.467 | 31.972 | 1.015  |
| H8  | -24.088 | 34.344 | 2.045  |
| O9  | -25.880 | 35.291 | 1.608  |
| H10 | -26.815 | 33.227 | 2.841  |
| O11 | -25.643 | 34.218 | 4.227  |
| N12 | -25.581 | 31.444 | 4.473  |
| H13 | -23.951 | 32.355 | 3.523  |
| C14 | -24.594 | 33.739 | -0.617 |
| H15 | -26.237 | 32.861 | 0.428  |
| O16 | -23.520 | 34.577 | -0.269 |

|     |         |        |        |
|-----|---------|--------|--------|
| H17 | -25.340 | 35.892 | 1.075  |
| H18 | -25.958 | 35.114 | 4.029  |
| H19 | -25.000 | 30.666 | 4.710  |
| H20 | -25.391 | 34.306 | -1.138 |
| H21 | -24.288 | 32.902 | -1.269 |
| H22 | -23.067 | 34.875 | -1.069 |
| C23 | -25.014 | 28.919 | 1.764  |
| C24 | -24.961 | 28.851 | 0.229  |
| C25 | -25.401 | 27.439 | -0.143 |
| C26 | -24.632 | 26.306 | 0.548  |
| C27 | -24.254 | 27.743 | 2.389  |
| O28 | -24.780 | 26.518 | 1.927  |
| H29 | -26.079 | 28.854 | 2.066  |
| O30 | -24.445 | 30.092 | 2.301  |
| H31 | -23.916 | 29.036 | -0.080 |
| O32 | -25.747 | 29.794 | -0.428 |
| N33 | -25.463 | 27.243 | -1.618 |
| H34 | -26.436 | 27.330 | 0.195  |
| O35 | -25.131 | 25.090 | 0.182  |
| C36 | -24.362 | 27.700 | 3.908  |
| H37 | -23.182 | 27.819 | 2.111  |
| O38 | -23.733 | 26.583 | 4.438  |
| H39 | -26.705 | 29.602 | -0.268 |
| H41 | -25.441 | 27.747 | 4.179  |
| H42 | -23.855 | 28.584 | 4.326  |
| H43 | -24.064 | 25.801 | 3.969  |
| H44 | -26.153 | 31.098 | 1.789  |
| H45 | -23.557 | 26.316 | 0.275  |
| H46 | -26.090 | 25.042 | 0.421  |
| H47 | -25.630 | 32.072 | 5.250  |
| H48 | -24.828 | 27.873 | -2.065 |

**Table S3.** Cartesian coordinates for FUR ligand suitable for 4P8V PDB structure.

|     |         |        |       |
|-----|---------|--------|-------|
| C1  | -26.896 | 32.277 | 3.391 |
| C2  | -24.720 | 33.541 | 3.293 |
| C3  | -26.231 | 33.591 | 2.961 |
| C4  | -28.397 | 32.140 | 3.091 |
| O5  | -29.137 | 33.319 | 3.294 |
| S6  | -26.582 | 34.043 | 1.219 |
| O7  | -26.876 | 32.812 | 0.434 |
| O8  | -27.855 | 34.850 | 1.368 |
| O9  | -25.456 | 34.823 | 0.713 |
| H10 | -26.654 | 34.438 | 3.524 |
| H11 | -28.476 | 31.771 | 2.052 |
| H12 | -28.827 | 31.371 | 3.750 |
| H13 | -28.718 | 34.041 | 2.774 |
| C14 | -24.907 | 31.056 | 3.008 |
| O15 | -24.380 | 30.024 | 2.232 |
| C16 | -26.591 | 26.739 | 0.418 |
| O17 | -27.748 | 26.013 | 0.630 |
| H18 | -27.932 | 25.954 | 1.579 |
| C19 | -25.081 | 28.926 | 1.666 |
| C20 | -25.909 | 29.084 | 0.377 |
| O21 | -26.975 | 28.127 | 0.396 |

|     |         |        |        |
|-----|---------|--------|--------|
| C22 | -25.483 | 26.485 | 1.432  |
| C23 | -24.430 | 27.590 | 1.312  |
| C24 | -24.840 | 28.740 | -0.658 |
| O25 | -24.047 | 27.735 | -0.048 |
| H26 | -26.352 | 30.083 | 0.262  |
| H27 | -25.040 | 25.497 | 1.229  |
| H28 | -25.903 | 26.469 | 2.454  |
| H29 | -23.533 | 27.380 | 1.911  |
| H30 | -24.228 | 29.629 | -0.885 |
| H31 | -25.265 | 28.356 | -1.602 |
| H32 | -26.243 | 26.461 | -0.591 |
| H33 | -25.706 | 28.900 | 2.572  |
| O34 | -26.280 | 31.174 | 2.766  |
| H35 | -24.742 | 30.834 | 4.087  |
| H36 | -26.745 | 32.216 | 4.488  |
| C37 | -24.108 | 32.309 | 2.628  |
| O38 | -22.787 | 32.169 | 3.046  |
| H39 | -24.183 | 32.422 | 1.526  |
| H40 | -24.655 | 33.384 | 4.386  |
| O41 | -24.051 | 34.725 | 3.048  |
| H42 | -22.396 | 31.423 | 2.571  |
| H43 | -24.169 | 34.963 | 2.110  |

#### Protocol S1.Docking protocole to 4P8V. PDB structure

```
_path: 4p8v_fur.yaml
ga:
  cx_eta: 5
  cx_pb: 0.5
  generations: 100
  lambda_: 3
  mu: 1.0
  mut_eta: 5
  mut_indpb: 1.0
  mut_pb: 0.5
  population: 100
genes:
- module: gaudi.genes.molecule
  name: Ligand0
  path: ./lig.mol2
- module: gaudi.genes.molecule
  name: Protein
  path: ./protein.mol2
- center:
  - -24.118
  - 30.171
  - 1.834
  interpolation: 0.5
  module: gaudi.genes.search
```

```
name: Search0
precision: 5
radius: 8.0
rotate: true
target: Ligand0
- library: dunbrack
  module: gaudi.genes.rotamers
  name: Rotamers
  residues:
    - Protein/213
    - Protein/269
    - Protein/360
objectives:
- module: gaudi.objectives.hbonds
  name: HBonds
  only_probes: true
  probes:
    - Ligand0
  weight: 1.0
- module: gaudi.objectives.energy
  name: Energy
  weight: -1.0
  targets: [Protein, Ligand0]
  forcefields: [amber99sbildn.xml]
  parameters: [[lig.mol2, lig.frcmod]]
- module: gaudi.objectives.contacts
  name: Clashes
  probes:
    - Ligand0
  radius: 5.0
  weight: -1.0
  which: clashes
- ligand: Ligand0
  module: gaudi.objectives.vina
  name: Vina0
  receptor: Protein
  weight: -1.0
output:
  check_every: 0
  compress: true
  history: false
  name: lig_4p8v
  pareto: false
  path: lig_4p8v
  precision: 3
  prompt_on_exception: true
  verbose: true
similarity:
  args:
```

```
- - Ligand0
- 2.5
kwargs: {}
module: gaudi.similarity.rmsd
```

## Protocol S2. Docking protocole to 2PE4.PDB structure

```
_path: 2pe4_ha.yaml1
ga:
  cx_eta: 5
  cx_pb: 0.5
  generations: 100
  lambda_: 3
  mu: 1.0
  mut_eta: 5
  mut_indpb: 1.0
  mut_pb: 0.5
  population: 100
genes:
- module: gaudi.genes.molecule
  name: Ligand0
  path: ./lig.mol2
- module: gaudi.genes.molecule
  name: Protein
  path: ./protein.mol2
- center:
  - 37.41
  - -22.557
  - -17.999
  interpolation: 0.5
  module: gaudi.genes.search
  name: Search0
  precision: 5
  radius: 8.0
  rotate: true
  target: Ligand0
- library: dunbrack
  module: gaudi.genes.rotamers
  name: Rotamers
  residues:
  - Protein/129
  - Protein/131
  - Protein/202
objectives:
- module: gaudi.objectives.hbonds
  name: HBonds
```

```
only_probes: true
probes:
- Ligand0
weight: 1.0
- forcefields:
  - amber99sbildn.xml
  module: gaudi.objectives.energy
  name: Energy
  parameters:
  - - lig_gaff.mol2
    - lig.frcmod
  targets:
  - Protein
  - Ligand0
  weight: -1.0
- module: gaudi.objectives.contacts
  name: Clashes
  probes:
  - Ligand0
  radius: 5.0
  weight: -1.0
  which: clashes
- ligand: Ligand0
  module: gaudi.objectives.vina
  name: Vina0
  receptor: Protein
  weight: -1.0
output:
  check_every: 0
  compress: true
  history: false
  name: lig_2pe4
  pareto: false
  path: lig_2pe4
  precision: 3
  prompt_on_exception: true
  verbose: true
similarity:
  args:
  - - Ligand0
  - 2.5
  kwargs: {}
  module: gaudi.similarity.rmsd
```
